# Supplementary material for: Mitochondrial-Targeted Triphenylphosphonium–Hydroxycamptothecin Conjugate and Its Nano-Formulations for Breast Cancer Therapy: In Vitro and In Vivo Investigation
Source: MDPI journal article supplement (doi:10.3390/pharmaceutics15020388), 2023-01-24
Supplement: s1 [file s1]

## Supporting Information

### Mitochondrial-Targeted Triphenylphosphonium–Hydroxycamptothecin Conjugate and Its Nano-formulations for Breast Cancer Therapy: *in vitro* and *in vivo* Investigation

Kunfeng Zhang<sup>1</sup>, Jingxin Fu<sup>2</sup>, Xiaorui Liu<sup>2</sup>, Yifei Guo<sup>2</sup>, Meihua Han<sup>2</sup>, Meifeng Liu<sup>3,\*</sup> and Xiangtao Wang<sup>1, 2,\*</sup>

- 1 School of Pharmacy, Henan University of Chinese Medicine, Zhengzhou 450046, China.
- 2 Institute of Medicinal Plant Development, Chinese Academy of Medical Sciences & Peking Union Medical College, Beijing 100193, China.
3. Key Laboratory of Functional Molecular Engineering of Guangdong Province, School of Chemistry and Chemical Engineering, South China University of Technology, Guangzhou, 510640, China

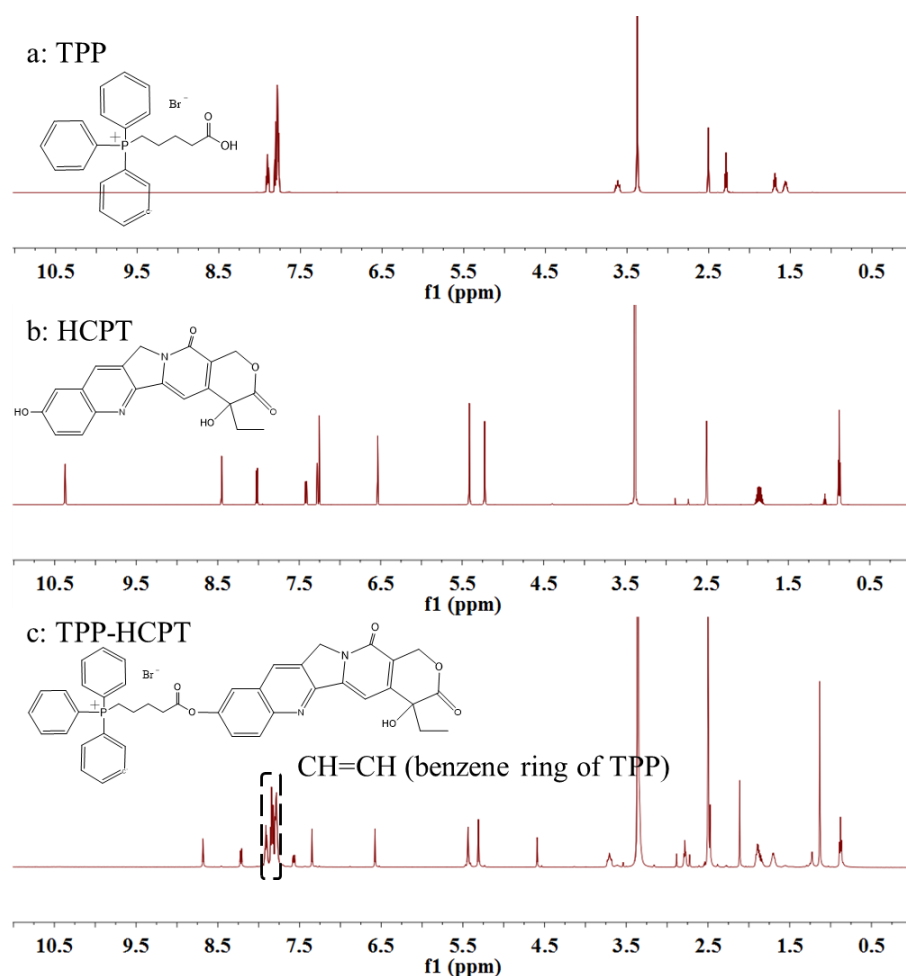

Figure S1. Proton NMR spectra of TPP(a), HCPT(b) and TPP-HCPT conjugate (c).

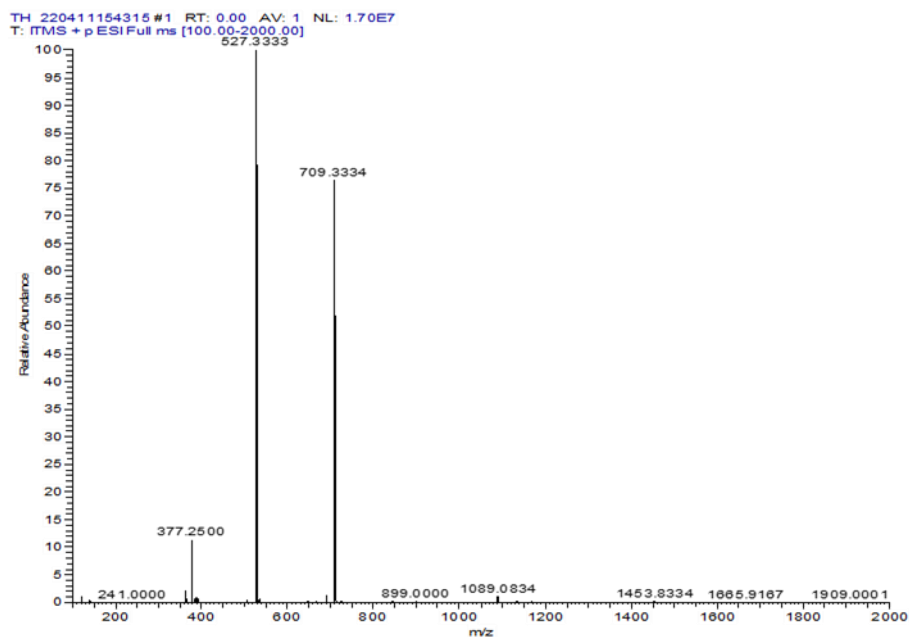

Figure S2. ESI-MS of TPP-HCPT (ESI source: I Spray Voltage: 4.50kV; Tube Lens: 110V; Capillary Temp: 275°C; Capillary Voltage: 35V; Sheath Gas Flow Rate: 5arb).

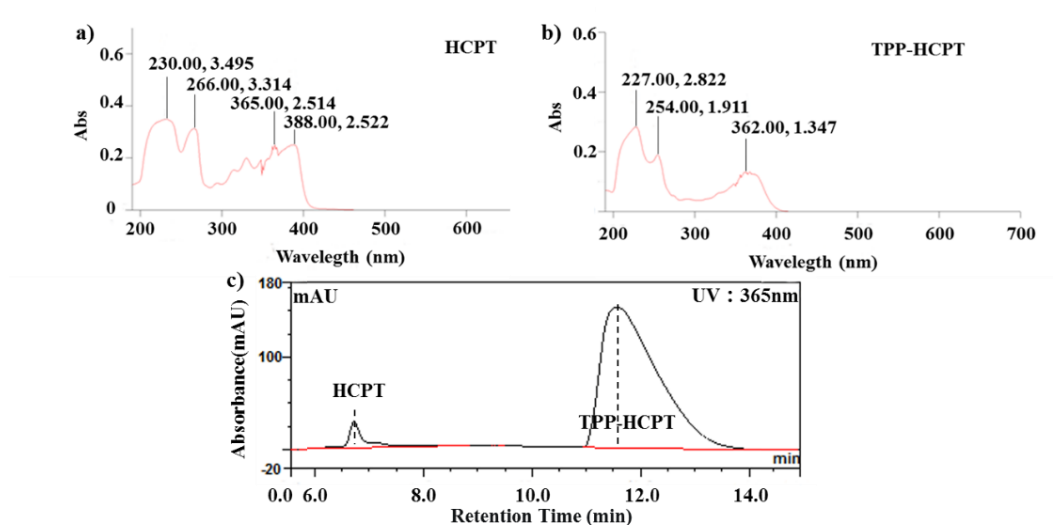

Figure S3. UV full-wavelength scanning of HCPT and TH (190nm-700nm, a and b). High performance liquid chromatography (HPLC) of HCPT and TH under the exact same chromatographic conditions (c).

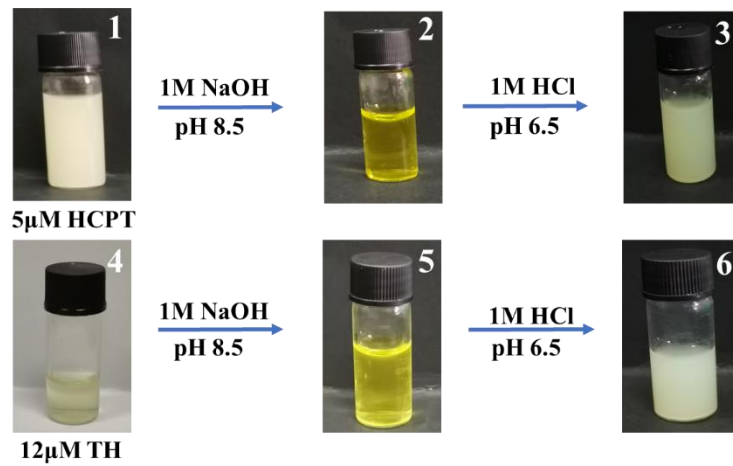

Figure S4. HCPT and TH in deionized water (1 and 4), dissolved in alkaline solution (pH8.5) (2 and 5), and the subsequent aggregation when acidified to pH 6.5 using 1M HCl.

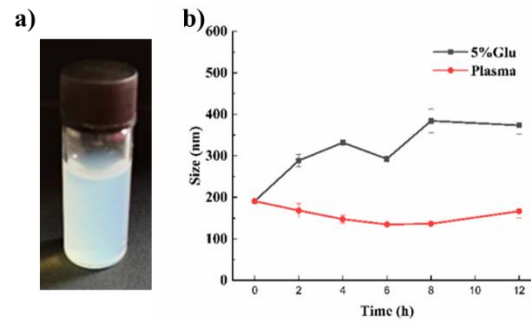

Figure S5. HCPT-loaded TH nanoparticles (a) and their particle size change in 5% glucose and plasma after HA coating (b).

Table S1. Particle size and PDI of TH solution at different concentrations.

| Concentration | Size(nm)    | PDI   | Zeta(mV) |
|---------------|-------------|-------|----------|
| 1mg/ml        | 203.2±12.34 | 0.312 | +0.026   |
| 5mg/ml        | 440.7±32.17 | 0.264 | +1.335   |
| 10mg/ml       | 580.9±13.62 | 0.330 | +3.452   |

Table S2. Particle size, PDI and zeta potential of HCPT-loaded TH nanoparticles and HA coated HCPT-loaded TH nanoparticles.

| Concentration                | Size(nm)   | PDI   | Zeta(mV) |
|------------------------------|------------|-------|----------|
| HCPT-loaded TH nanoparticles | 155.5±9.96 | 0.312 | +5.62    |
| HA coated HCPT-loaded TH NPs | 190.8±6.25 | 0.208 | -3.71    |

Table S3. The particle size and PDI value of TH nanoparticles (containing 1mg/mL of TH) made from different pharmaceutical adjuvants.

| Antisolvent<br>precipitation              | Mass ratio of<br>TH:materials | Size<br>(nm) | PDI   |
|-------------------------------------------|-------------------------------|--------------|-------|
| P188                                      | 1:4                           | 758.5±31.77  | 0.482 |
| TPGS                                      | 2:1                           | 367.9±17.44  | 0.482 |
| TPGS                                      | 1:2                           | 249.3±14.31  | 0.398 |
| DSPE-PEG <sub>2000</sub>                  | 4:1                           | 580.9±26.31  | 0.540 |
| DSPE-PEG <sub>2000</sub>                  | 1:4                           | 248.5±13.24  | 0.438 |
| PEG <sub>5000</sub> -PCL <sub>4800</sub>  | 4:1                           | 156.8±10.28  | 0.418 |
| PEG <sub>5000</sub> -PCL <sub>4800</sub>  | 1:1                           | 134.1±17.28  | 0.528 |
| PEG <sub>5000</sub> -PCL <sub>4800</sub>  | 1:4                           | 113.4±6.54   | 0.435 |
| PEG <sub>3000</sub> -PLGA <sub>5000</sub> | 4:1                           | 312.5±6.97   | 0.311 |
| PEG <sub>3000</sub> -PLGA <sub>5000</sub> | 1:1                           | 234.1±11.25  | 0.387 |
| PEG <sub>3000</sub> -PLGA <sub>5000</sub> | 1:2                           | 213.1±13.60  | 0.412 |
| PEG <sub>3000</sub> -PLGA <sub>5000</sub> | 1:3                           | 133.2±8.63   | 0.352 |
| PEG <sub>3000</sub> -PLGA <sub>5000</sub> | 1:4                           | 86.41±5.93   | 0.256 |
| chol-PEG <sub>1k</sub>                    | 4:1                           | 234.7±8.55   | 0.387 |
| chol-PEG <sub>1k</sub>                    | 1:4                           | 146.1±6.87   | 0.347 |
| hyaluronic acid <sub>3-10k</sub>          | 4:1                           | 422.3±13.14  | 0.294 |
| hyaluronic acid <sub>3-10k</sub>          | 1:4                           | 295.3±7.25   | 0.384 |
| hyaluronic acid <sub>40-50k</sub>         | 4:1                           | 346.6±18.30  | 0.786 |
| hyaluronic acid <sub>40-50k</sub>         | 1:4                           | 292.3±6.91   | 0.098 |
